# Supplementary material
Source: Springer Nature journal article supplement (https://www.springermedizin.de/resource/supplementary/12943_2014_1374_MOESM1_ESM.pdf/9552836)
Supplement: MOESM1 [file 9552836]

Table S1: Sequences of qPCR primers used in this study

|          | ffw                     | rev                      |
|----------|-------------------------|--------------------------|
| ACTB     | TCAAGATCATTGCTCCTCCTGAG | ACATCTGCTGGAAGGTGGACA    |
| AXIN2    | TTGGACCACAGCCATTCAGG    | GGAAAGGTGCTGCTGGGTCT     |
| CCND1    | GTCCTGTGACGCGCAAGTCT    | ACATGTTGGTGTCTGGGAAGC    |
| CDH1     | CAAAGCCCAGAATCCCCAAG    | CACACCTGGAATTGGGCAA      |
| CDH2     | TTCTGACAACAGCTTTGCCTCTG | TTTATTCAGAACGCTGGGGTCA   |
| DAAM1    | GACAGGTGGAGGGAAAGTCACA  | CCACCAGGATGGCCATATCA     |
| DAAM2    | TCACCTGAAGGTGCCAAGGA    | TGGGAGGACCAGAAGGAACC     |
| DSP      | AGGCTGCAAGACACCAGCAG    | AAGGCGCAGCCCAGTGATA      |
| ELF5     | TGACTGACAGCTAGGTGGACTGC | GCGATTCAGTGCCTCACCAC     |
| FN       | CCAAGCATCACCTGGGAGT     | CGAAGCAGAACAGGCAATGTG    |
| FOXC2    | GCGGCCTCCTGGTATCTCAA    | AGCCGGTGGGAGTTGAACAT     |
| FZD7     | GCTGACCCTGTCTCTGTGTGGT  | GCCCATGGTTCAAACCTTCC     |
| MAPK     | GCAAACAAGAATGCCAGTGCTC  | AGGTGGGTGCAGTTCCTGT      |
| MMP2     | GCCGTGTTTGCATCTGTTT     | CTGCAGGGAGCAGAGATTCCG    |
| MMP9     | ATTTCTGCCAGGACCGCTTC    | CTCAGGGCACTGCAGGATGT     |
| MUC1     | GCAGGTAATGGTGGCAGCAG    | GTGGAGTGAATGGCACTGG      |
| MYC      | CGGAACTCTTGTGCGTAAGGAA  | GCCAAGGTTGTGAGGTTGCAT    |
| NKD1     | TCCACATCCCACACCGAAAG    | TCTGAGACCTTGGCGATTGG     |
| OCLN     | CCACTGGCTGAGCTGATTGTG   | TCTGTTCTTTGCCCATGAGTGG   |
| PRICKLE1 | GAAAGTCCCCTCCGACAAT     | ACAGCCGCAGTCTGTCTTGG     |
| PRICKLE2 | GCAGTTTCAGATCGCCACCTT   | TGAGGCACCAGAGGGACAAA     |
| PRICKLE3 | GCAGCCTCCACAGCCTCTTT    | TCTGTGCTGGTGCCTTTGGT     |
| PRICKLE4 | GAACCGCTACTCGGATGCAG    | CACCGAGGTTTGGTCCCTTC     |
| RAC1     | CGCCTCCTGTAGTCGCTTTG    | CACGCTGTATTCTCGCCAGTG    |
| RHOA1    | GGTTTCACGCCTGAGGCAAT    | GCCAGATGCTTAAGTCCAGGTG   |
| ROCK2    | TGGCAACTGGGAAGAAGTGG    | CGGCAAGAATGTCCTGCGTA     |
| ROR2     | CACGTGCACATGAGGTCCAT    | CACCGGGTGTGGGATTTACA     |
| RPL37    | GTGGTTCCTGCATGAAGACAGTG | TTCTGATGGCGGACTTTACCG    |
| RUNX2    | CCACACCATTAGGGACCATCTG  | ACCTGGATTCTGGGCCAGTC     |
| SFRP1    | GATGCAGGAGGCTCAGGTGAT   | GCTGGCAACAGGTCAGAACG     |
| SNAI1    | CGAGCCCAGGCAGCTATTTTC   | CCCACAAGTGACAGCCATT      |
| SNAI2    | ATCTGCCAGACGCGAACTCA    | GGCAACCAGACAACCGACAT     |
| SOX10    | GCATCGGAGGCCTTACCACT    | TCTGGGTGGCCTAGCCCTTA     |
| TCF7L2   | AAACCAGCTGCCGCTTTTATG   | GCAACATCAACATGCCTAGGTTTT |

|       |                           |                          |
|-------|---------------------------|--------------------------|
| TJP   | TGATACAATGCTGTGCCCTAAAGTG | GAAATCGTGCTGATGTGCCATAAT |
| TWIST | GCGGCCAGGTACATCGACTT      | TGCAGCTTGCCATCTTGGAG     |
| VANGL | CAACCAGCCTCTGCTCATGG      | AGCCCACTACCCAGTTTATGCAG  |
| VIM   | TCAGCATCACGATGACCTTGAA    | CTGCAGAAAGGCACTTGAAAGC   |
| WNT3A | AGGTCCCACAGCCCTGAGAT      | TCCAGGAAAGCGGACCATTT     |
| WNT5A | TCGTTAGCAGCATCAGTCCACA    | GACCTGTGCCTTCGTGCCTA     |
| ZEB2  | TGGGCTAGTAGGCTGTGTCCA     | TCATCTTCAACCCTGAAACAGAGG |
